# Supplementary material for: Effect of Pneumococcal Vaccine on Mortality and Cardiovascular Outcomes: A Systematic Review and Meta-Analysis
Source: MDPI journal article supplement (doi:10.3390/jcm11133799), 2022-06-30
Supplement: s1 [file s1]

## **Supplementary figures and tables legend**

Table S1: Definition of Outcomes

Table S2: Newcastle-Ottawa scale for quality assessment and bias assessment of observational studies

Figure S1: Subgroup analyses based on cardiovascular risk for primary outcome: all-cause mortality

Figure S2: Subgroup analyses based on follow-up duration for primary outcome: all-cause mortality

Figure S3: Leave-one-out analysis for primary outcome: all-cause mortality

Figure S4: Subgroup analyses based on cardiovascular risk for secondary outcome: MI

Figure S5: Subgroup analyses based on follow-up duration for secondary outcome: MI

Figure S6: Leave-one-out analysis for secondary outcome: MI

Figure S7: Leave-one-out analysis for secondary outcome: (A) CV mortality (B) Stroke

Figure S8: Meta-regression of male as an effect modifier for all-cause mortality

Figure S9: Funnel plots for publication bias for primary outcome: all-cause mortality

Figure S10: Funnel plots after trim-and-fill for primary outcome: all-cause mortality

## Supplementary File Index

### Study question:

Outcome of Pneumococcal vaccinated group and Placebo among patients with and without established cardiovascular disease

### PICO Questionnaires

P= patient/population (Patients with and without established cardiovascular disease)

I= Intervention arm (Pneumococcal vaccinated group)

C= Comparison arm (Placebo/control group)

O= outcomes (primary outcome): all-cause mortality. Secondary outcomes: myocardial infarction, cardi mortality, and stroke.

### Search Strategy:

((Pneumococcal Vaccine) OR (PPV)) AND ((Cardiovascular outcomes) OR (Myocardial Infarction )) AND ((Heart failure)) AND ((Acute coronary syndrome)).

Table S1: Definition of Outcomes

| Study Variable                     | Definition                                                                                                                                                                                                                                                                                                                                                                                                                                                                                                                                             |
|------------------------------------|--------------------------------------------------------------------------------------------------------------------------------------------------------------------------------------------------------------------------------------------------------------------------------------------------------------------------------------------------------------------------------------------------------------------------------------------------------------------------------------------------------------------------------------------------------|
| <b>All Cause Mortality</b>         | All studies that indicated mortality used a primary endpoint as all-cause mortality. All-cause mortality is defined as death from any cause that occurred during follow-up period among participants in intervention and comparison groups.                                                                                                                                                                                                                                                                                                            |
| <b>MACE</b>                        | Major adverse cardiovascular events (MACE) is defined as a composite of in-hospital all-cause death, acute myocardial infarction, or any cardiovascular events.                                                                                                                                                                                                                                                                                                                                                                                        |
| <b>Acute Myocardial Infarction</b> | Presumptive cases of AMI were initially identified on the basis of primary hospital discharge ICD-9 diagnosis codes for acute myocardial infarction (ICD-9 410).<br>AMI was defined as a detection of rise and/or fall in cardiac biomarkers together with at least one of the following: symptoms of ischaemia, ECG changes indicative of new ischaemia (new ST- T changes, new left bundle branch block and/or development of pathological Q waves) and/or imaging evidence of new loss of viable myocardium or new regional wall motion abnormality |
| <b>Stroke</b>                      | Stroke was defined as an accident which led to loss of neurological function with residual symptoms at least 24 hrs after onset, presumed to be from vascular etiology.                                                                                                                                                                                                                                                                                                                                                                                |
| <b>Cardiovascular mortality</b>    | Cardiovascular mortality is defined as death occurred due cardiovascular disease such as one of the following: acute myocardial infarction, acute rheumatic fever and chronic rheumatic heart disease, ischemic heart disease,                                                                                                                                                                                                                                                                                                                         |



|                         |   |   |   |   |    |   |   |  |   |
|-------------------------|---|---|---|---|----|---|---|--|---|
| Ihara<br>2019           | ★ | ★ | ★ | ★ | ★★ | ★ | ★ |  | 8 |
| Hsieh<br>2016           | ★ | ★ | ★ |   | ★★ | ★ | ★ |  | 7 |
| Siriwar<br>dena<br>2014 | ★ | ★ | ★ | ★ | ★  | ★ | ★ |  | 7 |
| Lamont<br>agne<br>2008  | ★ | ★ | ★ | ★ | ★  | ★ | ★ |  | 7 |

\*Score >6 was considered as an adequate quality study.

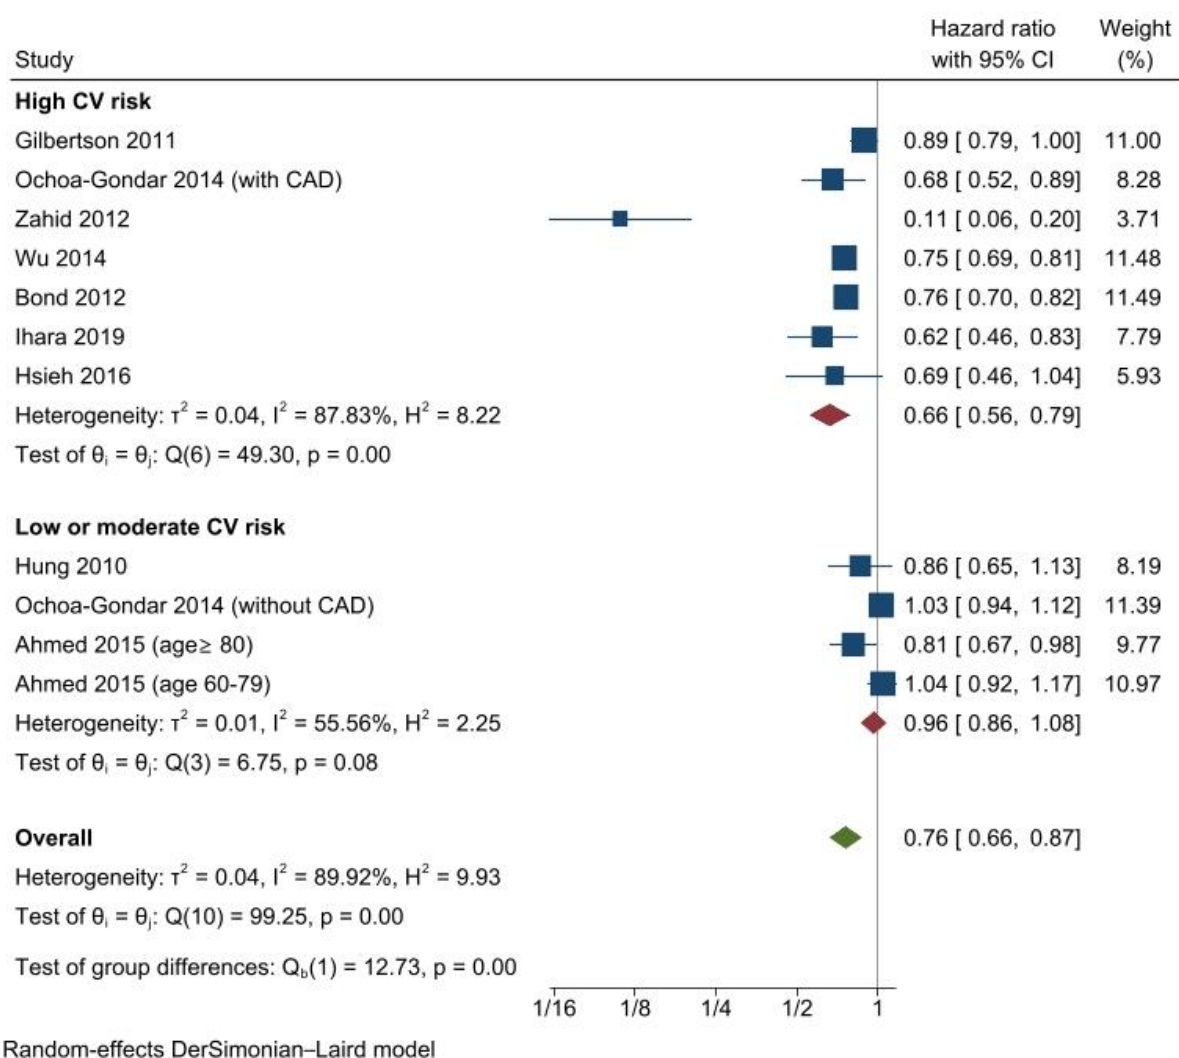

Figure S1: Subgroup analyses based on cardiovascular risk for primary outcome: all-cause mortality

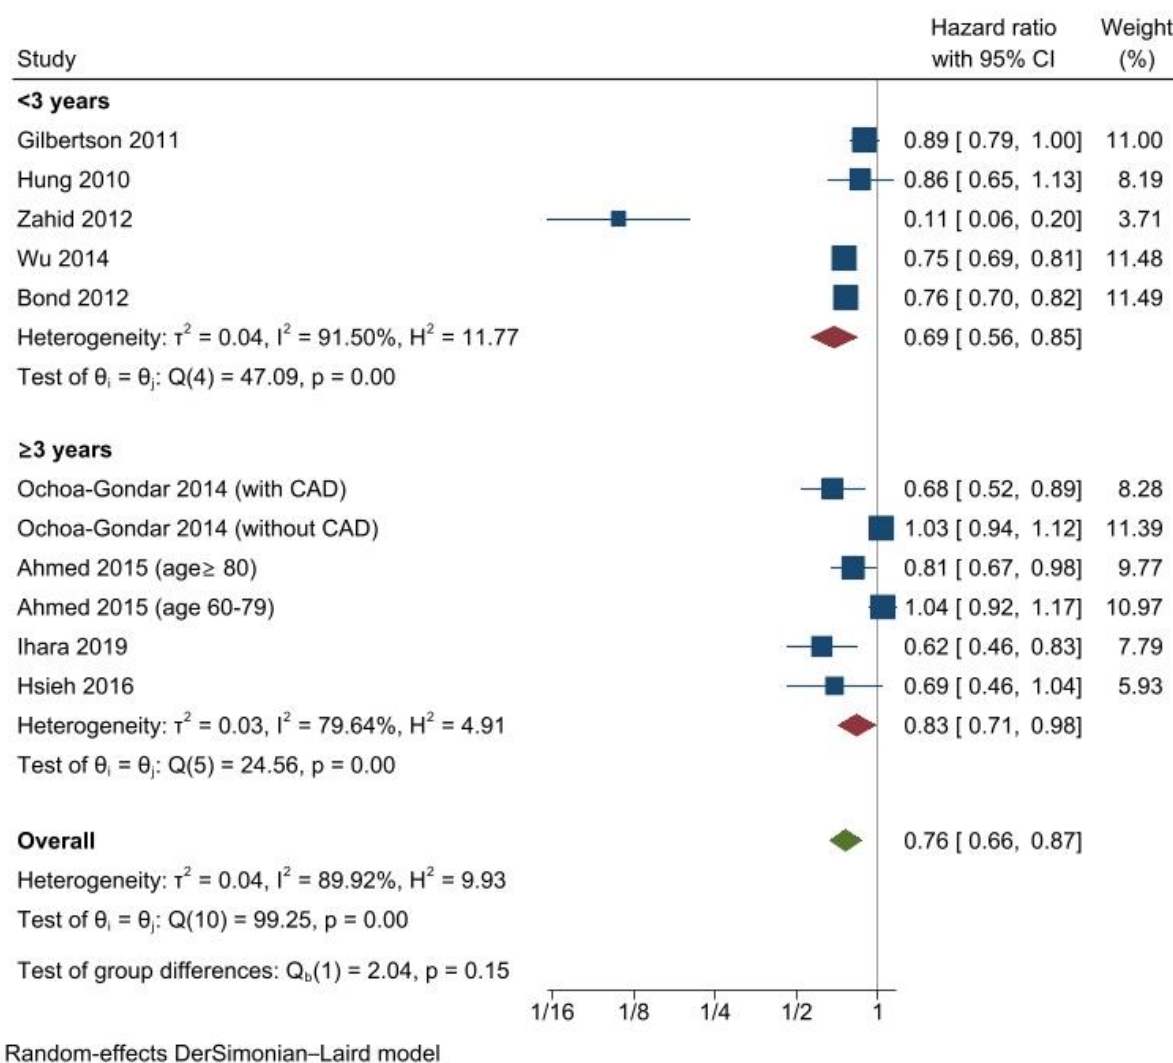

Figure S2: Subgroup analyses based on follow-up duration for primary outcome: all-cause mortality

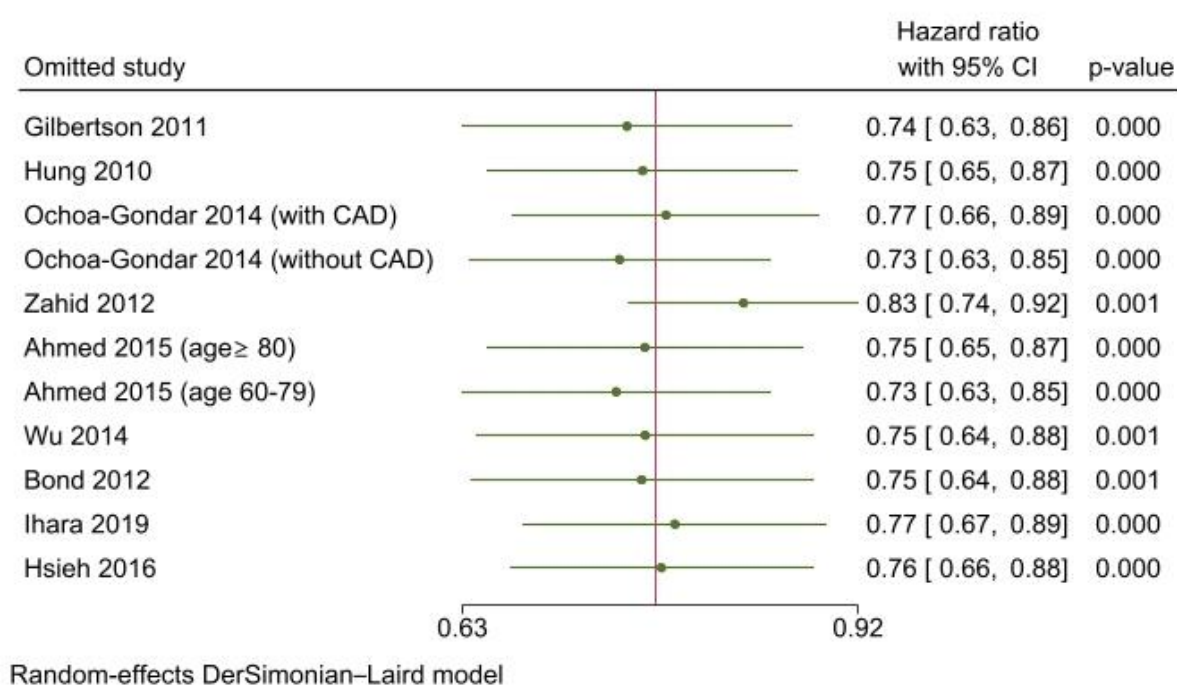

Figure S3: Leave-one-out analysis for primary outcome: all-cause mortality

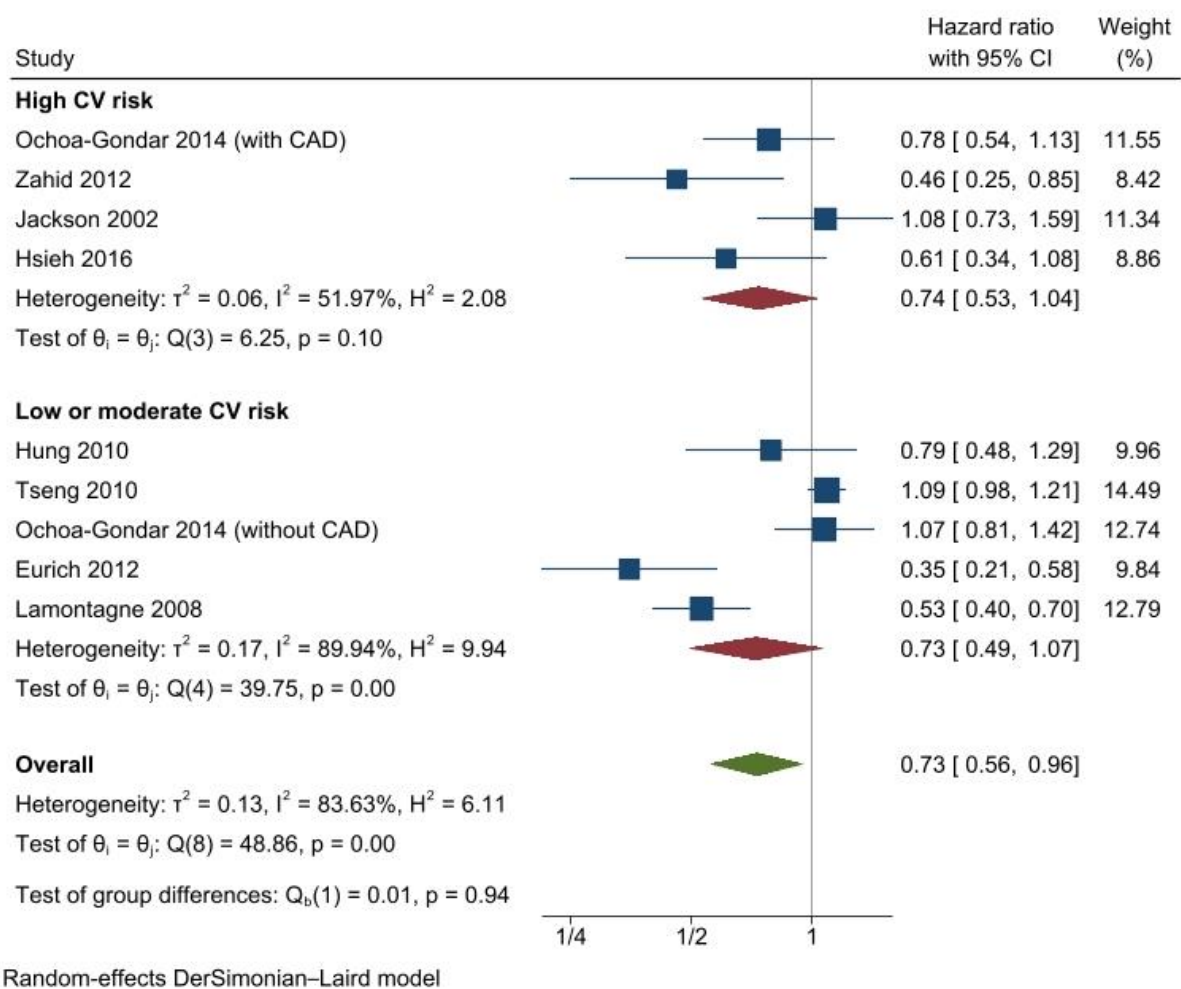

Figure S4: Subgroup analyses based on cardiovascular risk for secondary outcome: MI



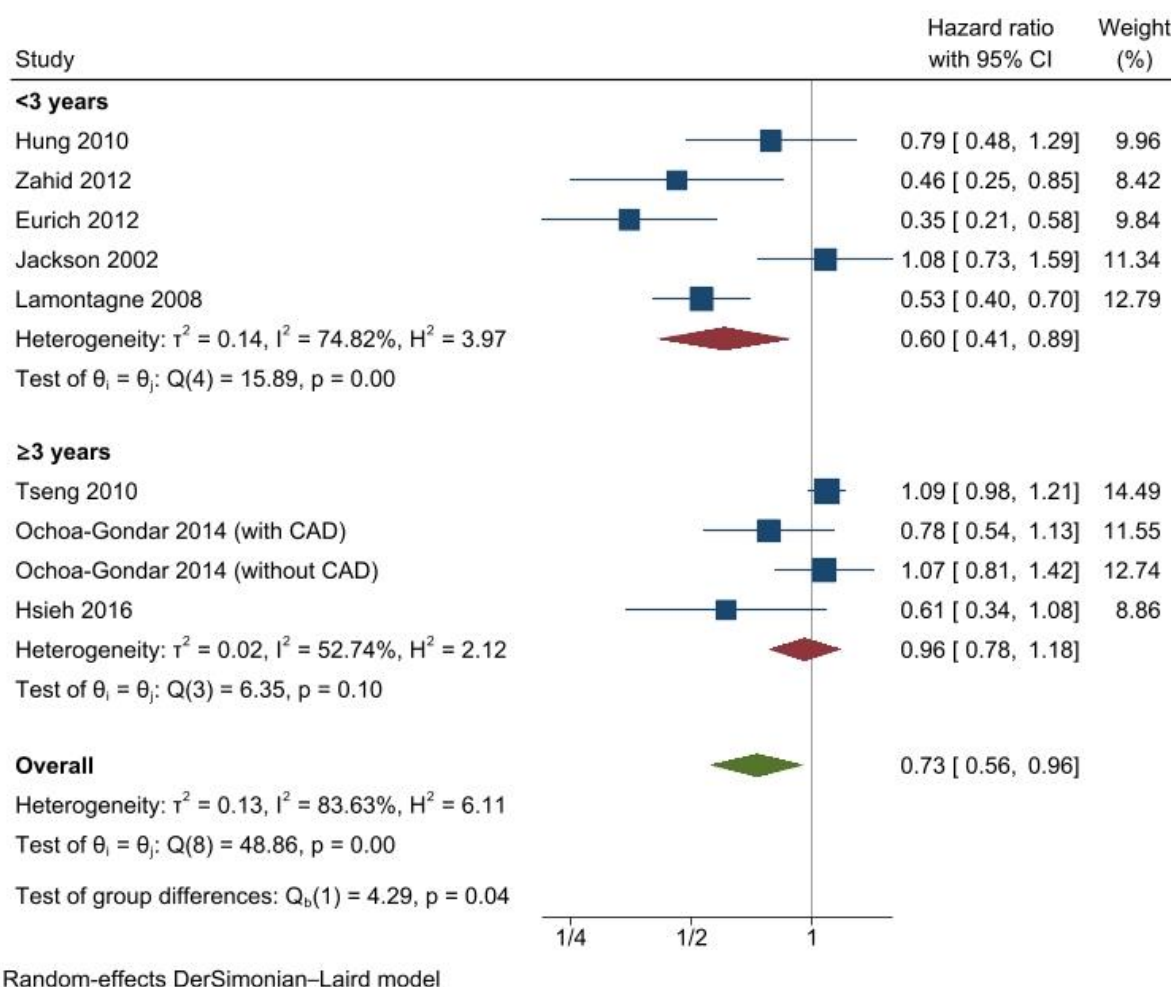

Figure S5: Subgroup analyses based on follow-up duration for secondary outcome: MI

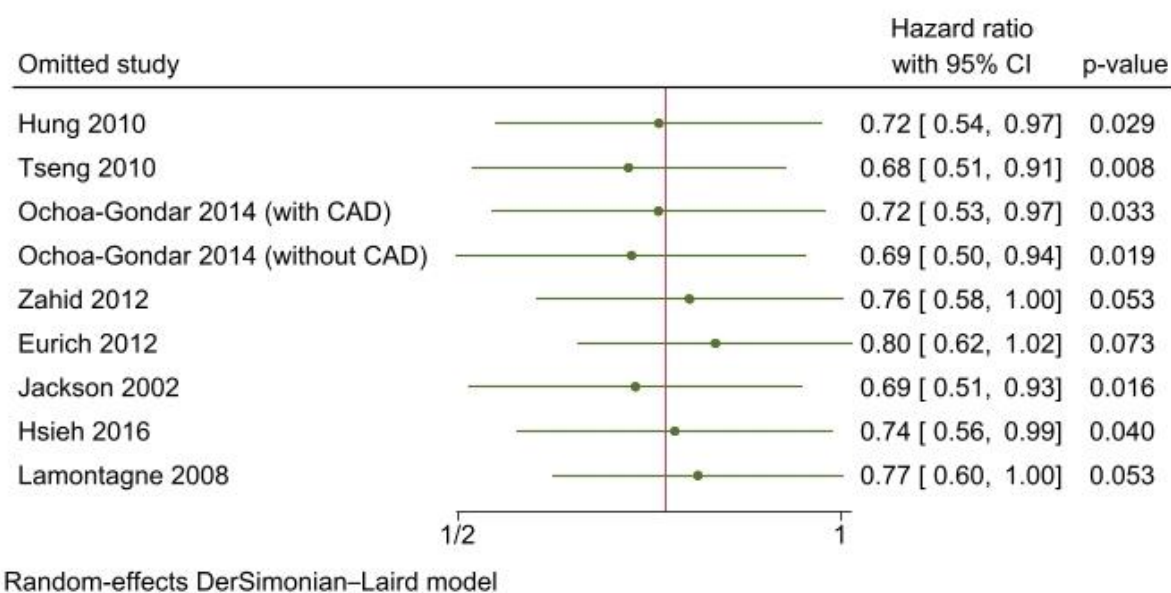

Figure S6: Leave-one-out analysis for secondary outcome: MI

### A) CV mortality

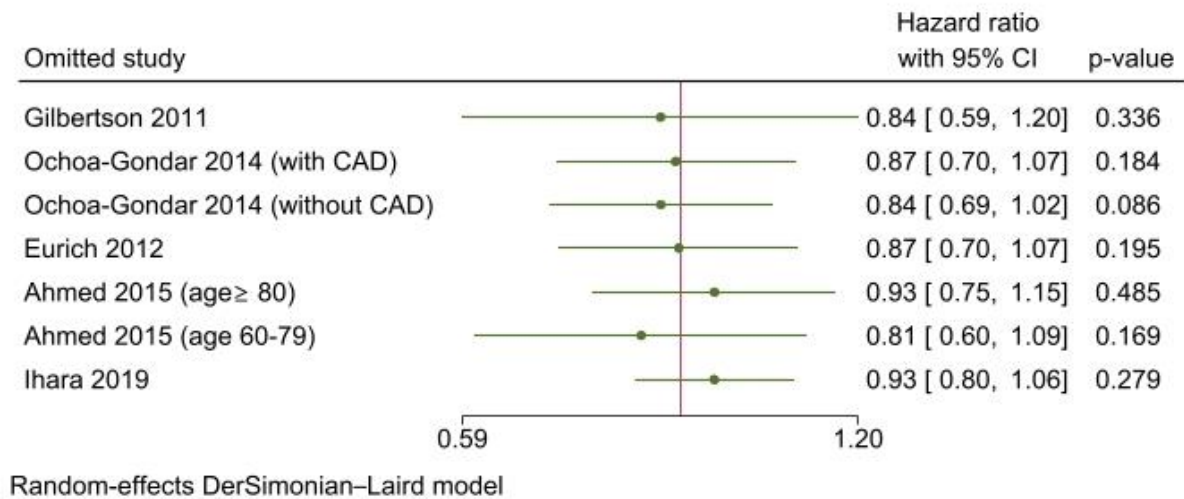

### B) Stroke

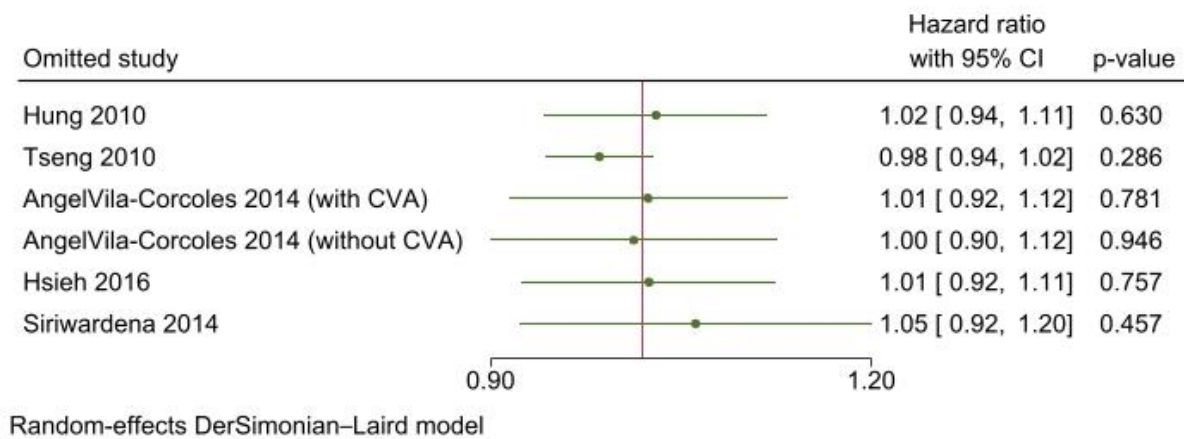

Figure S7: Leave-one-out analysis for secondary outcome: (A) CV mortality (B) Stroke

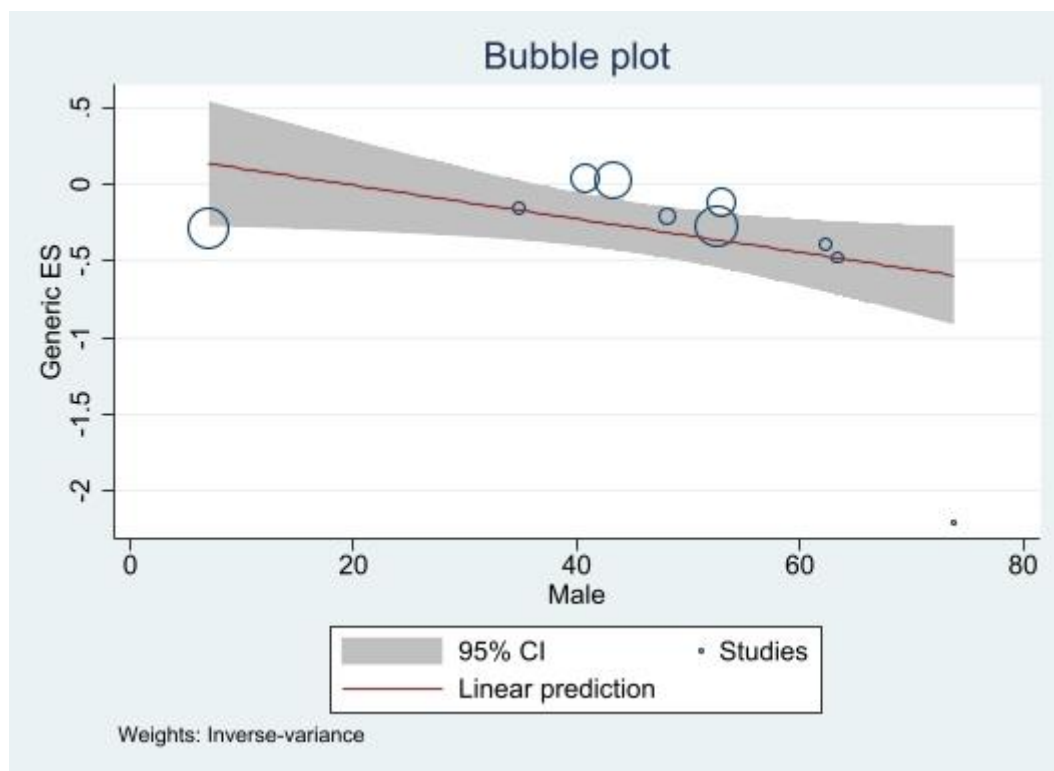

Figure S8: Meta-regression of male as an effect modifier for all-cause mortality

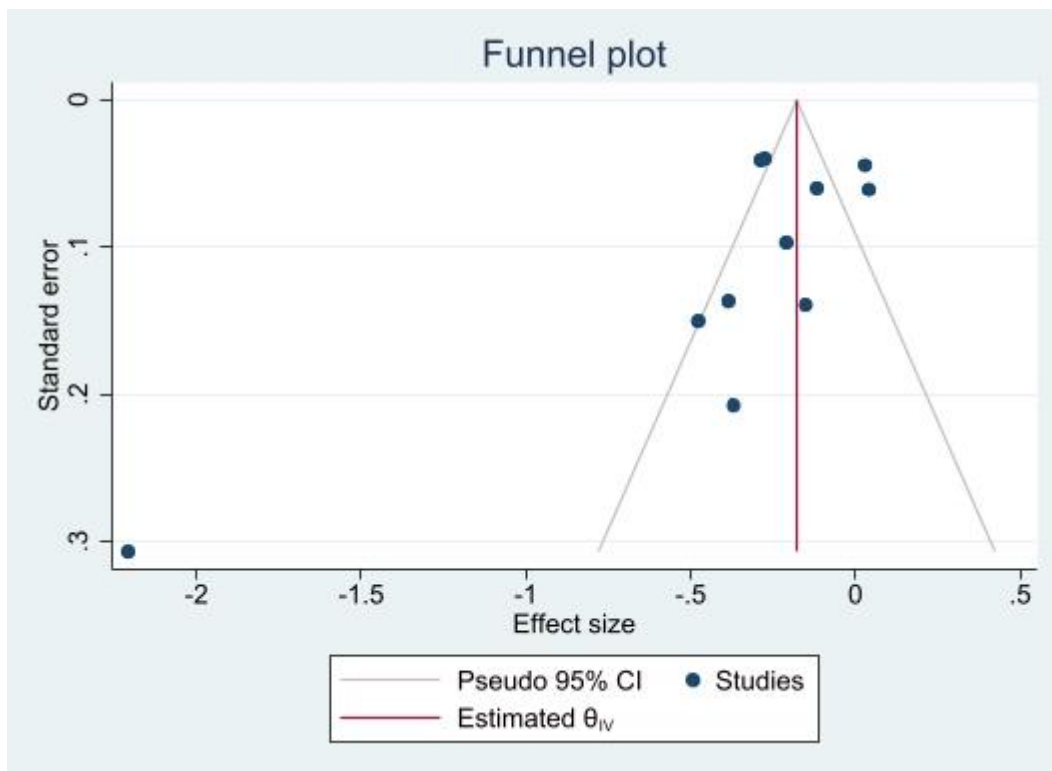

Figure S9: Funnel plots for publication bias for primary outcome including (A) all-cause mortality

A) MI

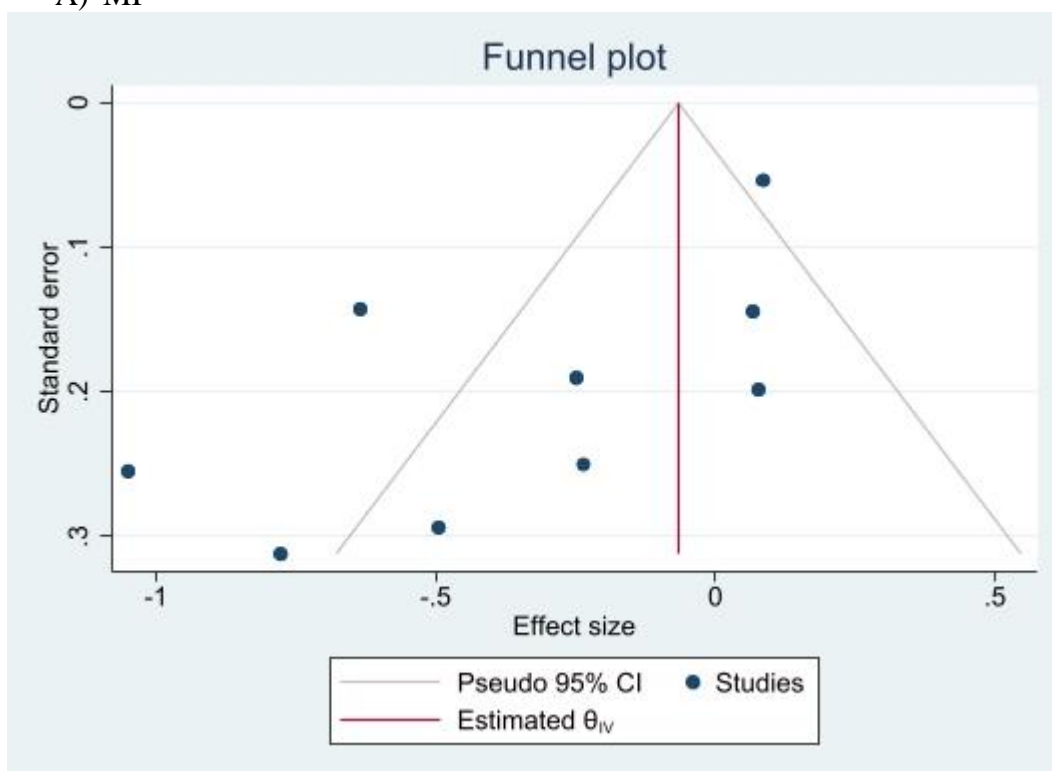

B) CV mortality

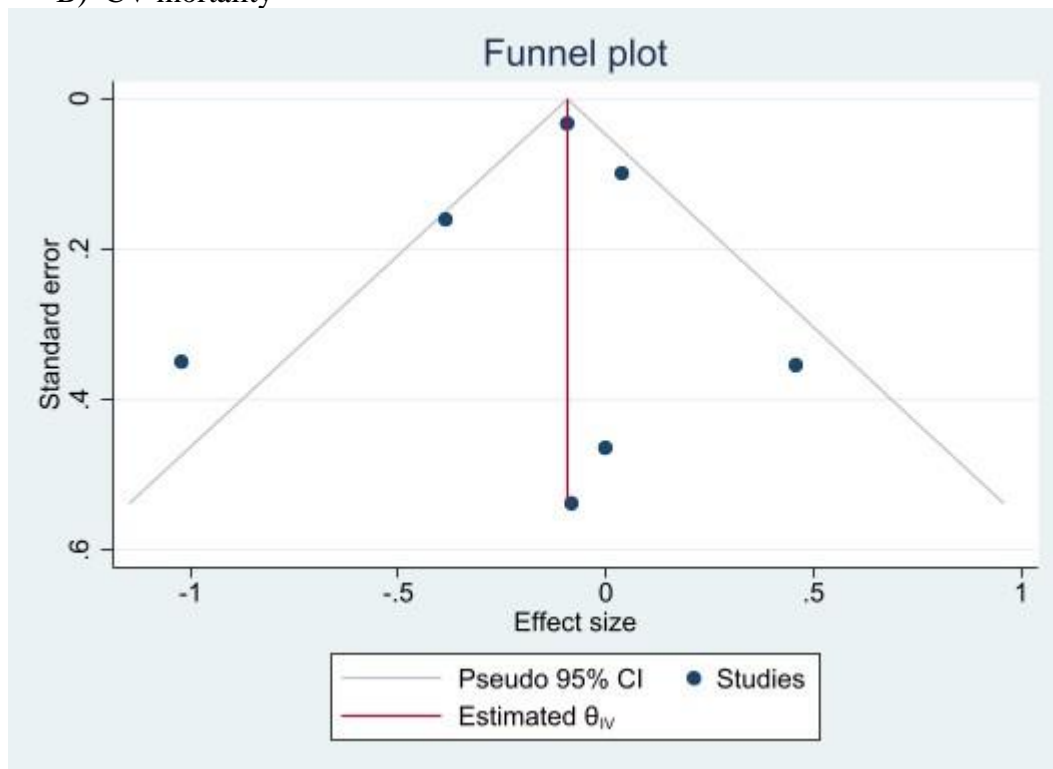

C) Stroke

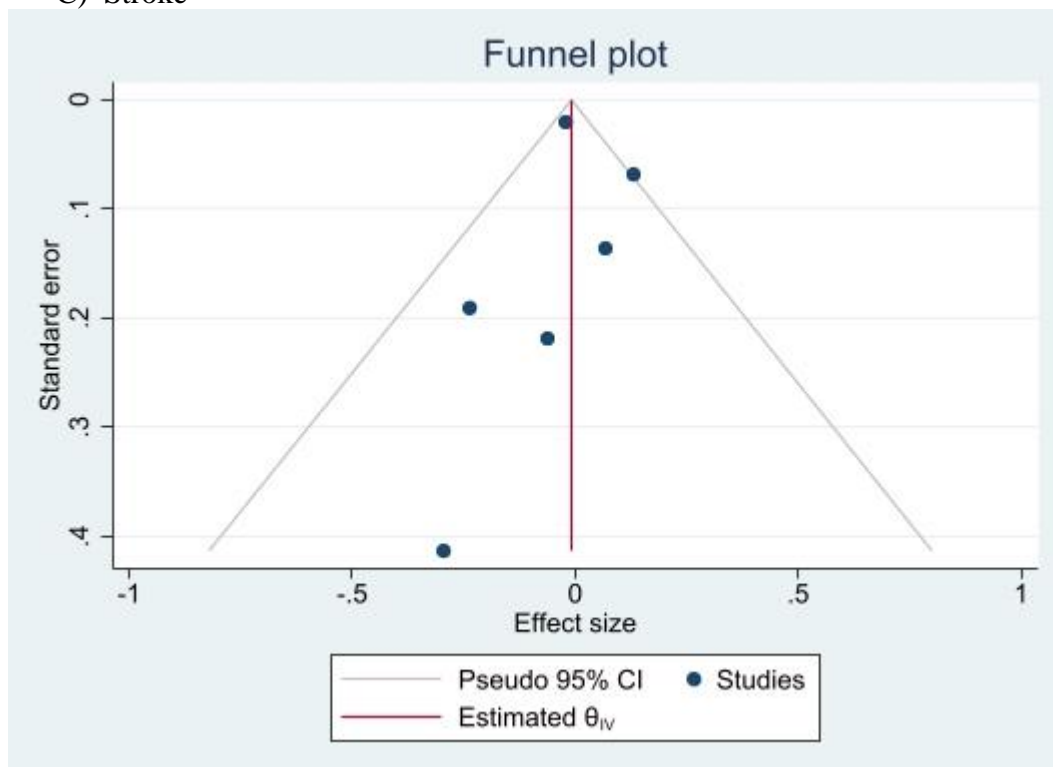

Figure S10: Funnel plots for publication bias for secondary outcomes including A) MI, B) CV mortality, C) Stroke
